# Supplementary material for: Spatially Confined Ni3Se4/C Architecture via Continuous Selenization: Dual-Role Carbon Matrix Enables Ultrahigh-Rate Lithium Storage and Reveals Sodium-Ion Transport Limitations
Source: Research Square preprint supplement (doi:10.21203/rs.3.rs-7261910/v1), 2025-08-08
Supplement: Supplementary file 1 [file 6cf265ab46980c6974deda98.docx]

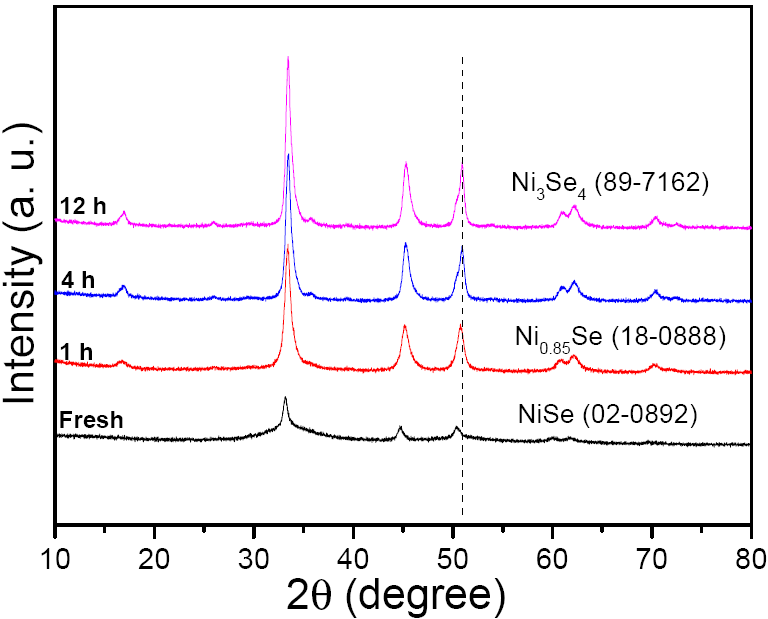


**Fig. S1** XRD patterns of nickel selenides at different reaction times from NiCl2·6H2O


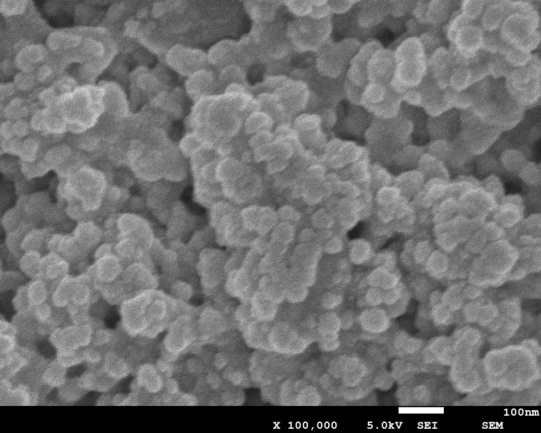




**Fig. S2** SEM images and size distribution of Ni3Se4 nanoparticles from NiCl2·6H2O


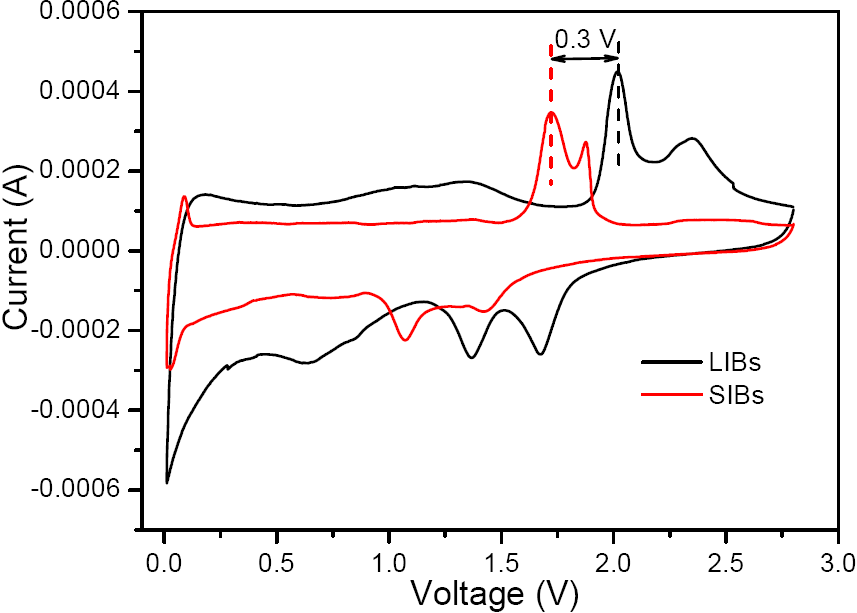


**Fig. S3** the 2nd cycle CV curve of Ni3Se4/C electrode as both LIBs and SIBs anodes
